# Supplementary material
Source: publisher site journal article supplement (https://www.spandidos-publications.com/4671/downloadSupplementary)

Figure S1. When hNOK cells were treated with oxymatrine (8 mg/ml), (A) the cell apoptosis and (B) cell proliferation were not changed significantly. (C) The treatment of oxymatrine did not influence the protein level of METTL14, WTAP, ALKBH5 and FTO in CAL-27 cells. (D) The transfection efficiency of CXCR4 and METTL3 plasmids were determined at mRNA level by RT-qPCR. The data of each group were normalized compared with the mean of the control group or 0 mg/ml group. \*\*\*P<0.001. CXCR4, CXC chemokine receptor 4; METTL, methyltransferase-like protein; m<sup>6</sup>A, N<sup>6</sup>-methyladenosine; ALKBH5, alkb homolog 5; WTAP, WT1 associated protein; FTO, fat mass and obesity-associated protein.

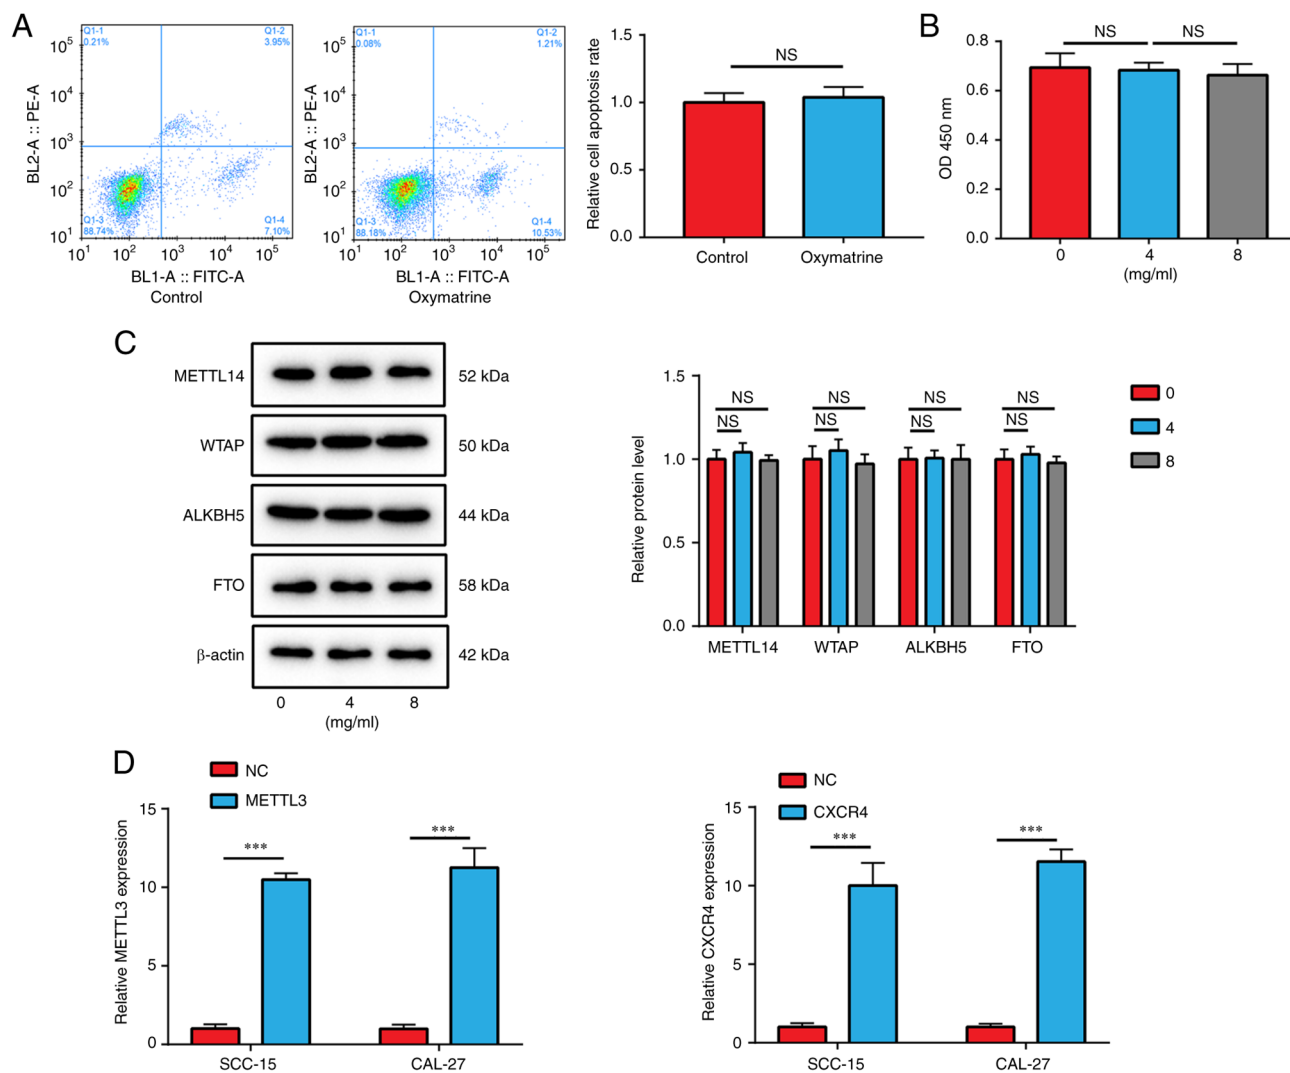

Supplement: Supplementary file 1 [file downloadSupplementary]
